# Supplementary material
Source: MDPI journal article supplement (https://www.mdpi.com/1424-2818/15/5/668)
Supplement: s1 [file s1]

**Table S1.** Summary of fifteen microsatellite loci run for all samples. Universal tail sequences were bound to the 5' tail of the forward primer following Blacket et al., (2012). Final concentration of forward (label + forward) and reverse primers in PCR was 0.3 (uM) each. The volumes reported create a 10 uM working solution from 100 uM primer stocks. Microsatellites were grouped and run together in a multiplex PCR reaction.

| Locus   | Size range<br>(bp) | Forward<br>primer<br>tail/label | Forward primer sequence (5'-3') | Reverse primer sequence (5'-3')     | Multiplex<br>group | Number<br>of alleles | Label<br>Volume<br>(ul) | Forward<br>Primer<br>Volume<br>(ul) | Reverse<br>Primer<br>Volume<br>(ul) |
|---------|--------------------|---------------------------------|---------------------------------|-------------------------------------|--------------------|----------------------|-------------------------|-------------------------------------|-------------------------------------|
| GmuD55  | 175-220            | Universal NED                   | GTG ATA CTC TGC AAC CCA TCC     | TTG CAT TCA GAA TAT CCA TCA G       | 1                  | 12                   | 1.0                     | 9.0                                 | 10.0                                |
| GmuD90  | 122-134            | Universal FAM                   | ATA GCA GGA CAA TTA CCA CCA G   | CCT AGT TGC TGC TGA CTC CAC         | 1                  | 3                    | 0.5                     | 9.5                                 | 10.0                                |
| GmuD87  | 190-255            | Universal VIC                   | AAA CCC TAA GAC ATC AGA CAG G   | CAA ATC CAG TAC CCA GAA AGT C       | 1                  | 10                   | 1.0                     | 9.0                                 | 10.0                                |
| GmuD88  | 115-171            | Universal VIC                   | AAC AAT GCC TGA AAA TGC A C     | AGG CTA CCT CTG AAA ATG CTG         | 2                  | 12                   | 0.5                     | 9.5                                 | 10.0                                |
| Cp2     | 187-229            | Universal PET                   | C TCT AAG GGT TGC ACT TCT CAA A | GAG GTG GCA TCA AAA CAT CAT         | 2                  | 9                    | 1.0                     | 9.0                                 | 10.0                                |
| GmuD28  | 180-230            | Universal NED                   | AGC TGT TTG TCA TCA TAC ACT CTC | TGG CCC TCA TGT TTT ATA AGT G       | 2                  | 14                   | 2.0                     | 8.0                                 | 10.0                                |
| BTCA9   | 147-188            | Universal FAM                   | TAC TCA AGA TTT GAA GCA GAT ACA | GGC TTG ATT CTA CTG TCA CTT AC      | 2                  | 11                   | 1.0                     | 9.0                                 | 10.0                                |
| Eb19    | 97-110             | Universal NED                   | AGG GCT CTG AAG CAC TAA AGT AA  | GGC ACT GAA ATA AGA GAA AGT A       | 3                  | 3                    | 1.0                     | 9.0                                 | 10.0                                |
| GmuD93  | 185-389            | Universal VIC                   | AGA CTC TCT TGA CCA GAT TTT CTC | TCT GCC TTC TAT CAC TCT CCT G       | 3                  | 2                    | 1.0                     | 9.0                                 | 10.0                                |
| GmuD107 | 189-209            | Universal FAM                   | GAC AAA CAT GAA CAG GAG AAG AG  | ATT AGA GAG ACA GAT AGA TAG GAC TTG | 3                  | 10                   | 1.0                     | 9.0                                 | 10.0                                |
| Eb17    | 94-117             | Universal VIC                   | CCC ACA AAA GTA GAC ACC TAT     | GGC ACT GAA ATA AGA GAA AGT A       | 4                  | 6                    | 1.0                     | 9.0                                 | 10.0                                |
| GmuD121 | 138-178            | Universal FAM                   | GGCAAA TAT CCA ATA GAA ATC C    | CAA CTT CCT CGT GGG TTC AG          | 4                  | 7                    | 1.0                     | 9.0                                 | 10.0                                |
| GmuD79  | 164-192            | Universal PET                   | GCC CTG TTC CAT TCT TAT TCT G   | ATC CCC TTA GTC GTC TCT TTT C       | 4                  | 1                    | 1.0                     | 9.0                                 | 10.0                                |
| GmuD16  | 149-210            | Universal NED                   | ATC CCT GAA ATT TTG TGT GTT C   | TTT ACT CTA GAA GGG GCA ATC C       | 5                  | 15                   | 0.5                     | 9.5                                 | 10.0                                |
| GmuD40  | 182-285            | Universal PET                   | T TTG TCA TAT CAT CCA CTC ACC   | TTT GTC ACA GAT GGG AAT TAG C       | 5                  | 25                   | 2.0                     | 8.0                                 | 10.0                                |

**Table S2.** Summary of pairwise  $F_{ST}$  (above diagonal) and  $D$  (Jost D) (below diagonal). Bold values do not include 0 in the 95% confidence intervals.

|      | IN01          | IN06          | IN07          | MI05          | MI06          | MI07          | MI10          | MI15          | OH01          | OH06          | OH08          | OH09          | OH13          | OH16          | OH17          | OH18          |
|------|---------------|---------------|---------------|---------------|---------------|---------------|---------------|---------------|---------------|---------------|---------------|---------------|---------------|---------------|---------------|---------------|
| IN01 | 0             | 0.0284        | 0.0441        | <b>0.0800</b> | <b>0.0945</b> | <b>0.0681</b> | 0.0541        | 0.0695        | <b>0.0683</b> | <b>0.1465</b> | <b>0.1727</b> | <b>0.1739</b> | <b>0.1418</b> | <b>0.1349</b> | <b>0.2093</b> | <b>0.0758</b> |
| IN06 | <b>0.0448</b> | 0             | 0.0283        | 0.0556        | <b>0.0706</b> | <b>0.0548</b> | 0.0491        | 0.0507        | 0.0652        | <b>0.1395</b> | <b>0.1314</b> | <b>0.1446</b> | <b>0.0957</b> | <b>0.1112</b> | <b>0.1188</b> | <b>0.0543</b> |
| IN07 | <b>0.0618</b> | <b>0.0451</b> | 0             | 0.0422        | <b>0.0683</b> | 0.0332        | 0.0360        | 0.0281        | <b>0.0528</b> | <b>0.0972</b> | <b>0.1133</b> | <b>0.1243</b> | <b>0.0928</b> | <b>0.1049</b> | <b>0.1494</b> | 0.0297        |
| MI05 | <b>0.0786</b> | <b>0.07</b>   | <b>0.062</b>  | 0             | 0             | 0.0052        | 0             | 0             | 0.0117        | <b>0.0520</b> | <b>0.0492</b> | <b>0.0549</b> | <b>0.0420</b> | <b>0.0410</b> | <b>0.0914</b> | 0             |
| MI06 | <b>0.0848</b> | <b>0.0844</b> | <b>0.0646</b> | 0             | 0             | 0             | -0.0035       | 0             | 0             | <b>0.0497</b> | <b>0.0338</b> | <b>0.0322</b> | 0.0195        | <b>0.0441</b> | <b>0.1013</b> | 0             |
| MI07 | <b>0.0676</b> | <b>0.0650</b> | <b>0.0418</b> | 0.0084        | 0.0021        | 0             | -0.0051       | 0             | 0.0031        | <b>0.0422</b> | <b>0.0361</b> | <b>0.0258</b> | 0.0147        | <b>0.0284</b> | <b>0.0930</b> | 0.0027        |
| MI10 | <b>0.0643</b> | <b>0.0708</b> | <b>0.0573</b> | 0.0035        | -0.0123       | -0.0056       | 0             | -0.0079       | 0.0038        | <b>0.0499</b> | <b>0.0495</b> | 0.0132        | 0.0112        | <b>0.0267</b> | <b>0.0995</b> | 0             |
| MI15 | <b>0.0812</b> | <b>0.0708</b> | <b>0.0534</b> | 0.0023        | 0.0068        | -0.001        | -0.0126       | 0             | 0.0012        | 0.0308        | 0.0304        | 0.0187        | 0.0043        | 0.0080        | <b>0.0595</b> | 0             |
| OH01 | <b>0.0868</b> | <b>0.0689</b> | <b>0.0498</b> | <b>0.0206</b> | 0.0013        | 0.0075        | 0.0052        | 0.0025        | 0             | 0.0048        | 0.0150        | 0.0185        | 0.0089        | 0.0175        | <b>0.0597</b> | 0.0106        |
| OH06 | <b>0.1266</b> | <b>0.1103</b> | <b>0.0714</b> | <b>0.0467</b> | <b>0.0344</b> | <b>0.0304</b> | <b>0.0367</b> | <b>0.0324</b> | 0.0164        | 0             | 0             | 0             | 0             | 0.0089        | <b>0.0860</b> | <b>0.0380</b> |
| OH08 | <b>0.1257</b> | <b>0.1062</b> | <b>0.0804</b> | <b>0.0421</b> | <b>0.0251</b> | <b>0.0311</b> | <b>0.0368</b> | <b>0.0341</b> | <b>0.0177</b> | 0.0054        | 0             | 0.0021        | 0.0087        | 0.0114        | <b>0.0929</b> | 0.0259        |
| OH09 | <b>0.1236</b> | <b>0.1121</b> | <b>0.0862</b> | <b>0.0485</b> | <b>0.0305</b> | <b>0.0304</b> | <b>0.0355</b> | <b>0.0298</b> | <b>0.0274</b> | -0.0011       | 0.0103        | 0             | 0             | 0.0109        | <b>0.0638</b> | 0.0243        |
| OH13 | <b>0.1048</b> | <b>0.0884</b> | <b>0.0643</b> | <b>0.0325</b> | <b>0.0275</b> | <b>0.0142</b> | <b>0.0226</b> | 0.0096        | 0.0170        | 0.0069        | 0.0148        | 0.0076        | 0             | 0.0092        | <b>0.0583</b> | 0.0085        |
| OH16 | <b>0.1106</b> | <b>0.1034</b> | <b>0.0834</b> | <b>0.0435</b> | <b>0.0342</b> | <b>0.0246</b> | <b>0.0268</b> | 0.0178        | <b>0.0216</b> | <b>0.0170</b> | <b>0.0256</b> | <b>0.0191</b> | <b>0.0114</b> | 0             | <b>0.0680</b> | <b>0.0262</b> |
| OH17 | <b>0.1488</b> | <b>0.1071</b> | <b>0.1055</b> | <b>0.0907</b> | <b>0.0798</b> | <b>0.0678</b> | <b>0.0842</b> | <b>0.0626</b> | <b>0.0615</b> | <b>0.0656</b> | <b>0.0715</b> | <b>0.0582</b> | <b>0.0548</b> | <b>0.0473</b> | 0             | <b>0.0516</b> |
| OH18 | <b>0.0896</b> | <b>0.0661</b> | <b>0.0509</b> | 0.0015        | 0.0062        | 0.0111        | -0.0014       | 0.0042        | 0.0253        | <b>0.0449</b> | <b>0.0367</b> | <b>0.0461</b> | <b>0.0293</b> | <b>0.0373</b> | <b>0.0721</b> | 0             |

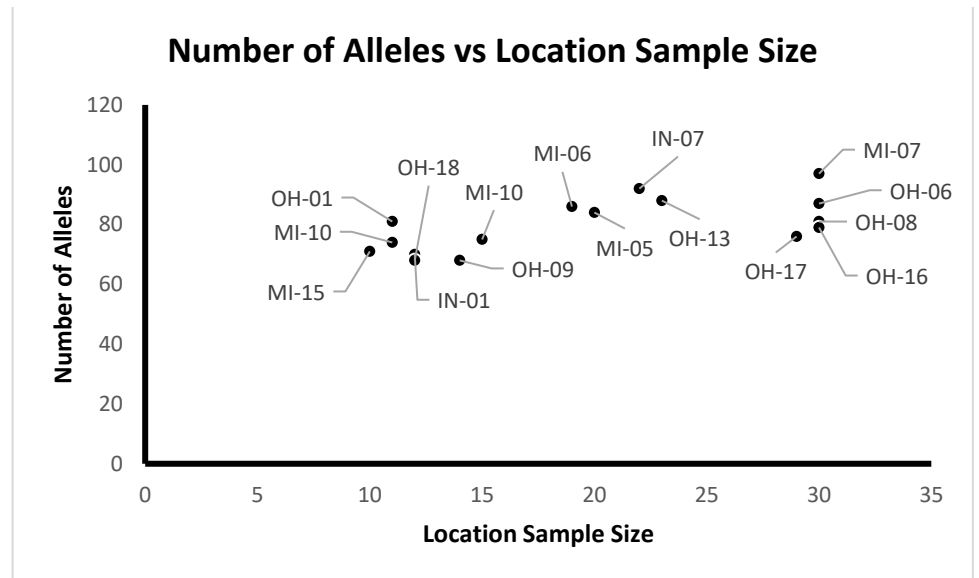

Figure S1. Number of alleles detected at locality versus sample size by locality. Number of alleles vs sample size shows relative levels of genetic diversity by locality.

Figure S2. MedMeaK and MedMedK values reducing inclusion of extra clusters, estimated using the methods of Puechmaille (2016). Models are based on STRUCTURE using LOCPRIOR at a .5 threshold. Showing bar graphs for (a) K=6 and (b) K=7.

K=6

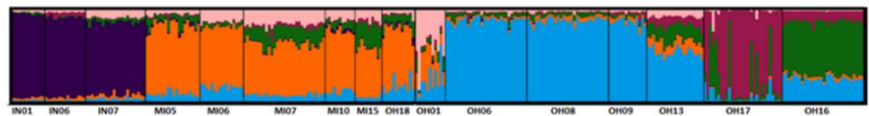

(a)

K=7

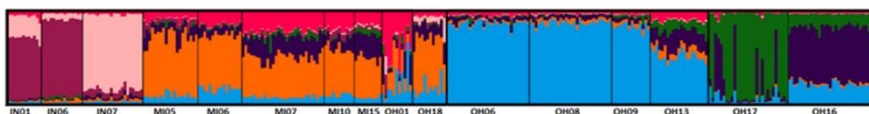

(b)

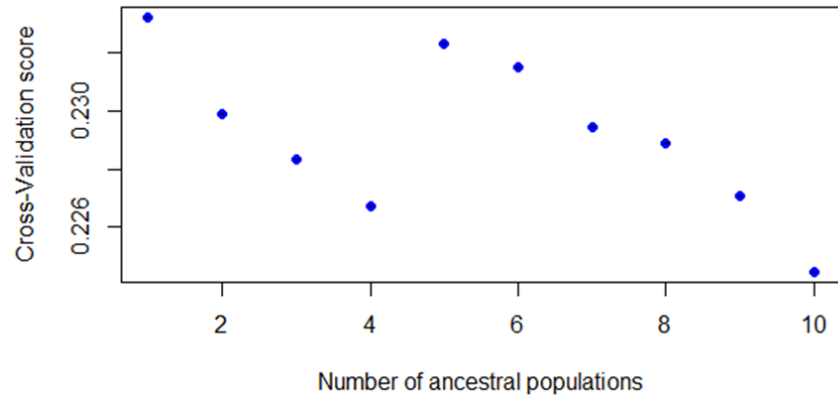

(a)

Figure S3. Cross validation score for inferring number of clusters.

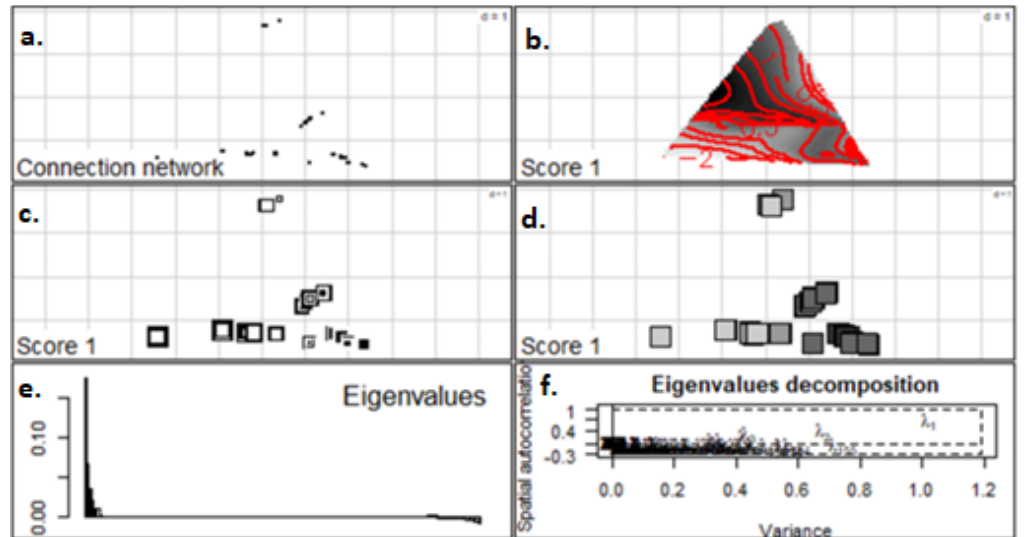

Figure S4. Spatial Principal Component Analysis (a) connection network based on overlap in home range, (b) local structure displayed using contour lines (closer line represent increased differentiation), (c) global structure displayed through color and size (smaller squares are less differentiated), (d) global structure displayed through grayscale, (e) eigenvalues, where positive represents global structure and negative values are local structure, (f) decomposition in eigenvalues indicating where the majority of variation is held.

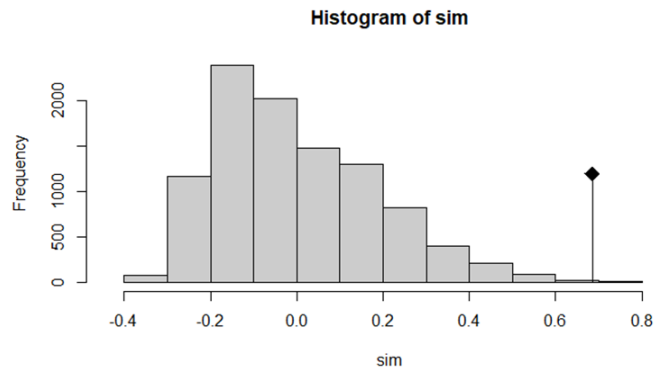

**Figure S5.** Histogram of Mantel test for isolation by distance (IBD).

**Table S3.** Locality Grouping based on Tes3r cluster assignment.

| <b>Tess3r Cluster</b> | <b>N</b> | <b>Sites</b>                             |
|-----------------------|----------|------------------------------------------|
| <b>Cluster 01</b>     | 49       | IN01, IN06, IN07                         |
| <b>Cluster 02</b>     | 108      | MI05, MI06, MI07, MI10, MI15, OH01, OH18 |
| <b>Cluster 03</b>     | 97       | OH06, OH08, OH09, OH13                   |
| <b>Cluster 04</b>     | 59       | OH16, OH17                               |

Table S4. Mean historic migration calculated through Migrate, recent migration rate from BayesAss. Migrate indicates the mean migration rate with 95% confidence interval. BayesAss displays mean migration rate with 95% confidence interval derived from migration rate by population size.

| TESS3r Cluster pair | Historic Migration Rate | Recent Migration Rate |
|---------------------|-------------------------|-----------------------|
| Cluster 01 - 02     | 0.0038 ( $\pm 0.0035$ ) | 0.08 ( $\pm 0.12$ )   |
| Cluster 01 - 03     | 0.0087 ( $\pm 0.0045$ ) | 0.08 ( $\pm 0.12$ )   |
| Cluster 01 - 04     | 0.0046 ( $\pm 0.0037$ ) | 0.09 ( $\pm 0.13$ )   |
| Cluster 02 - 01     | 0.0091 ( $\pm 0.0045$ ) | 0.08 ( $\pm 0.12$ )   |
| Cluster 02 - 03     | 0.0091 ( $\pm 0.0047$ ) | 0.08 ( $\pm 0.13$ )   |
| Cluster 02 - 04     | 0.011 ( $\pm 0.0048$ )  | 0.09 ( $\pm 0.13$ )   |
| Cluster 03 - 01     | 0.0085 ( $\pm 0.0044$ ) | 0.08 ( $\pm 0.13$ )   |
| Cluster 03 - 02     | 0.0056 ( $\pm 0.0052$ ) | 0.08 ( $\pm 0.12$ )   |
| Cluster 03 - 04     | 0.0094 ( $\pm 0.0046$ ) | 0.09 ( $\pm 0.13$ )   |
| Cluster 04 - 01     | 0.0057 ( $\pm 0.0042$ ) | 0.08 ( $\pm 0.12$ )   |
| Cluster 04 - 02     | 0.0054 ( $\pm 0.0040$ ) | 0.08 ( $\pm 0.13$ )   |
| Cluster 04 - 03     | 0.0067 ( $\pm 0.0039$ ) | 0.08 ( $\pm 0.13$ )   |

Table S5. Total emigration, total immigration, and net emigration for mean historic (Migrate) and recent (BayesAss) migration. A positive value for net emigration suggest that the cluster is a source of migrants.

|         | Total Emigration |                 | Total Immigration |                 | Net Emigration   |                 |
|---------|------------------|-----------------|-------------------|-----------------|------------------|-----------------|
|         | Mean<br>Historic | Mean<br>Reccent | Mean<br>Historic  | Mean<br>Reccent | Mean<br>Historic | Mean<br>Reccent |
| Cluster |                  |                 |                   |                 |                  |                 |
| 01      |                  |                 |                   |                 |                  |                 |
| Cluster | 0.0017           | 0.25            | 0.0233            | 0.24            | -0.0062          | +0.01           |
| 02      | 0.0292           | 0.25            | 0.0148            | 0.24            | +0.0144          | +0.01           |
| Cluster | 0.0235           | 0.25            | 0.0245            | 0.24            | -0.0010          | +0.01           |
| 03      | 0.0178           | 0.24            | 0.0250            | 0.27            | -0.0072          | -0.03           |
| Cluster |                  |                 |                   |                 |                  |                 |
| 04      |                  |                 |                   |                 |                  |                 |

R Code for Mantel Test:

```
install.packages("ade4")
library(ade4)
library(ade4genet)

EBgp=read.genepop("EBgp.gen")
EB=genind2genpop(EBgp)
Dgen=dist.genpop(EB, method = 2)

loc=read.table("SiteLoc.csv", sep="," , header = T)
Fst=read.matrix("Fst.csv",header = FALSE,sep="," )
GeoDis=dist(cbind(loc$x,loc$y))

mant=mantel.randtest(m1=GeoDis, m2=Dgen, nrepet = 9999)
mant
plot(mant)
```

**Table S6.** Summary of descriptive statistics by Cluster derived from TESS3r including number of turtles sampled (N), total number of alleles (A), number of private alleles (PA), mean allelic richness (AR with SE), mean observed heterozygosity ( $H_o$  with SE), expected heterozygosity ( $H_E$  with SE), and inbreeding coefficient ( $F_{IS}$  includes 95% confidence interval).

| Site       | State | County | N  | A   | P  | AR          | $H_o$          | $H_E$          | $F_{IS}$           |
|------------|-------|--------|----|-----|----|-------------|----------------|----------------|--------------------|
| A          |       |        |    |     |    |             |                |                |                    |
| Cluster-01 | IN    |        | 49 | 122 | 19 | 8.37 (0.71) | 0.66<br>(0.03) | 0.68<br>(0.03) | 0.03 (-0.02-0.08)  |
| Cluster-02 | MI/O  |        | 10 | 138 | 19 | 8.48 (0.67) | 0.65<br>(0.02) | 0.68<br>(0.03) | 0.04 (0.01-0.08)   |
|            | H     |        | 8  |     |    |             |                |                |                    |
| Cluster-03 | OH    |        | 97 | 107 | 4  | 6.94 (0.52) | 0.66<br>(0.02) | 0.67<br>(0.02) | 0.02 (-0.01-0.06)  |
| Cluster-04 | OH    |        | 59 | 92  | 4  | 6.19 (0.33) | 0.69<br>(0.02) | 0.68<br>(0.02) | -0.01 (-0.06-0.04) |

**Table S7.** Summary of Bottleneck tests and effective population ( $N_e$ ) at the .05 and .02  $P_{Crit}$  values size estimates with 95% confidence intervals. Low p values <.05 represent heterozygosity deficiency rather than excess.

| Site       | BOTTLENECK           |                  |                   | Effective Population Size |                          |
|------------|----------------------|------------------|-------------------|---------------------------|--------------------------|
|            | <i>Wilcoxon test</i> | <i>Sign test</i> | <i>Mode shift</i> | Ne 0.05                   | Ne 0.02                  |
|            |                      |                  |                   | 95% CI                    | 95% CI                   |
| Cluster-01 | P= 0.976             | P= 0.038         | none              | 154.4 (80.3-805.3)        | 180.5 (111.2-424.8)      |
| Cluster-02 | P= 0.992             | P= 0.070         | none              | 3344.9 (362.0- $\infty$ ) | 535.7 (282.8-3037.1)     |
| Cluster-03 | P= 0.916             | P= 0.035         | none              | 790.7 (251.4- $\infty$ )  | 685.2 (286.5- $\infty$ ) |
| Cluster-04 | P= 0.927             | P= 0.107         | none              | 19.7 (16.1-24.2)          | 25.9 (21.7-31.3)         |
